# Supplementary material for: Ubiquitin turnover and endocytic trafficking in yeast are regulated by Ser57 phosphorylation of ubiquitin
Source: eLife journal article supplement (doi:10.7554/elife.29176), 2017-11-13
Supplement: supp [file elife-29176-supp-v1.zip]

Archive with 22 entries (22 files):
- elife_poa_e29176_Figure_7_figure_supplement_3.pdf
- elife_poa_e29176_Figure_1_source_data_2.xlsx
- elife_poa_e29176_Figure_4_figure_supplement_2.pdf
- elife_poa_e29176_Figure_1_figure_supplement_3.pdf
- elife_poa_e29176_Transparent_Reporting_File.pdf
- elife_poa_e29176_Figure_5_figure_supplement_2.pdf
- elife_poa_e29176_Figure_1_source_data_1.docx
- elife_poa_e29176_Figure_1_figure_supplement_2.pdf
- elife_poa_e29176_Figure_1_figure_supplement_1.pdf
- elife_poa_e29176_Figure_5_figure_supplement_3.pdf
- elife_poa_e29176_Figure_1_figure_supplement_5.pdf
- elife_poa_e29176_Figure_5_figure_supplement_1.pdf
- elife_poa_e29176_Figure_4_figure_supplement_3.pdf
- elife_poa_e29176_Figure_7_figure_supplement_2.pdf
- elife_poa_e29176_Figure_3_figure_supplement_1.pdf
- elife_poa_e29176_Figure_7_figure_supplement_1.pdf
- elife_poa_e29176_Figure_5_figure_supplement_5.pdf
- elife_poa_e29176_Figure_5_figure_supplement_4.pdf
- elife_poa_e29176_Figure_3_figure_supplement_2.pdf
- elife_poa_e29176_Figure_2_source_data1.xlsx
- elife_poa_e29176_Figure_1_figure_supplement_4.pdf
- elife_poa_e29176_Figure_4_figure_supplement_1.pdf
