# Supplementary material for: Ubiquitin turnover and endocytic trafficking in yeast are regulated by Ser57 phosphorylation of ubiquitin
Source: eLife journal article supplement (doi:10.7554/elife.29176), 2017-11-13
Supplement: supp [file elife-29176-supp-v1.zip › elife_poa_e29176_Figure_1_figure_supplement_1.pdf]

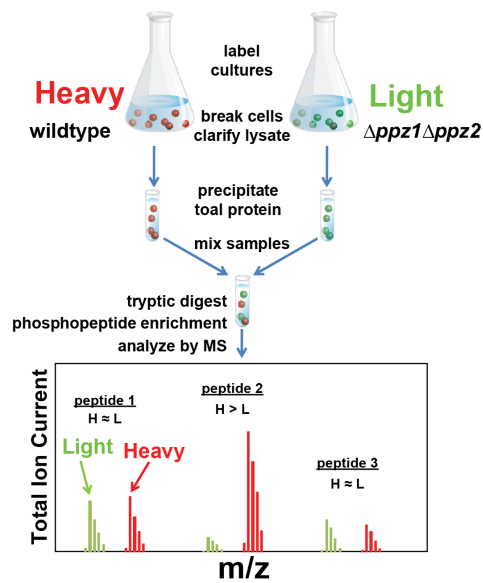

Phosphoproteome: WT (H) vs.  $\Delta ppz1\Delta ppz2$  (L)

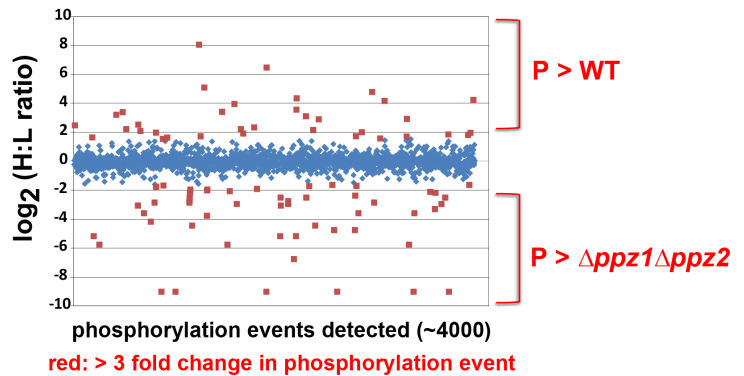

**Figure 1, figure supplement 1.** A SILAC-based quantitative comparison of the phosphoproteome in wildtype (heavy) and  $\Delta ppz1\Delta ppz2$  (light) cells. The schematic on the left shows the experimental approach for quantitative analysis of the phosphoproteome in *ppz* mutant cells. The scatter plot on the right summarizes SILAC-based quantitative analysis of yeast phosphoproteomes comparing wildtype (heavy) and *ppz* mutant (light) cells. All phosphorylated peptides with a fold difference greater than three are colored red. Results of this analysis tabulated in Figure 1, figure supplement 2.
