# Supplementary material for: Ubiquitin turnover and endocytic trafficking in yeast are regulated by Ser57 phosphorylation of ubiquitin
Source: eLife journal article supplement (doi:10.7554/elife.29176), 2017-11-13
Supplement: supp [file elife-29176-supp-v1.zip › elife_poa_e29176_Figure_1_figure_supplement_2.pdf]

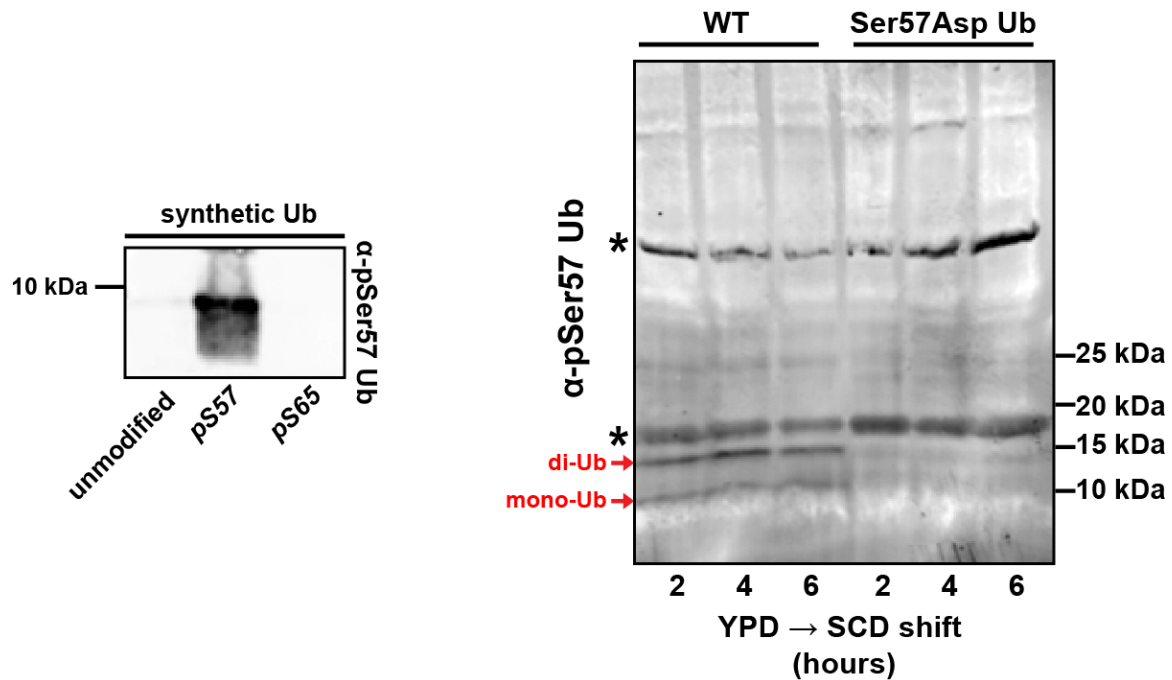

**Figure 1, figure supplement 2.** Analysis of antibodies recognizing pSer57 ubiquitin. The left panel shows immunoblot analysis of synthetic ubiquitin, phospho-Ser57 ubiquitin, and phospho-Ser65 ubiquitin using an  $\alpha$ -phospho-Ser57 specific antibody. The right panel shows immunoblot analysis using the same antibody to probe lysates from yeast expressing only wildtype ubiquitin or Ser57Asp ubiquitin. Many background bands are apparent but two low MW bands corresponding to mono- and di-ubiquitin are recognized by the antibody in a Ser57-specific manner.
