# Supplementary material for: Ubiquitin turnover and endocytic trafficking in yeast are regulated by Ser57 phosphorylation of ubiquitin
Source: eLife journal article supplement (doi:10.7554/elife.29176), 2017-11-13
Supplement: supp [file elife-29176-supp-v1.zip › elife_poa_e29176_Figure_1_figure_supplement_3.pdf]

|                 |                                                                                   |    |                 |
|-----------------|-----------------------------------------------------------------------------------|----|-----------------|
| genotype        | WT                                                                                | WT | $\Delta ppz1,2$ |
| FLAG-Rps31      | —                                                                                 | +  | +               |
| FLAG-Rpl40B     | —                                                                                 | +  | +               |
| $\alpha$ -FLAG  | 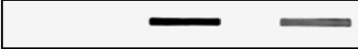 |    |                 |
| $\alpha$ -G6PDH | 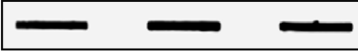 |    |                 |

|                 |                                                                                   |    |                 |
|-----------------|-----------------------------------------------------------------------------------|----|-----------------|
| genotype        | WT                                                                                | WT | $\Delta ppz1,2$ |
| FLAG-Rps31      | —                                                                                 | +  | +               |
| FLAG-Rpl40B     | —                                                                                 | +  | +               |
| $\alpha$ -FLAG  | 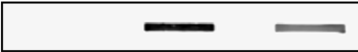 |    |                 |
| $\alpha$ -G6PDH | 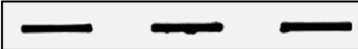 |    |                 |

|                 |                                                                                   |    |                 |
|-----------------|-----------------------------------------------------------------------------------|----|-----------------|
| genotype        | WT                                                                                | WT | $\Delta ppz1,2$ |
| FLAG-Rps31      | —                                                                                 | +  | +               |
| FLAG-Rpl40B     | —                                                                                 | +  | +               |
| $\alpha$ -FLAG  | 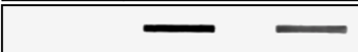 |    |                 |
| $\alpha$ -G6PDH | 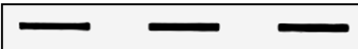 |    |                 |

**Figure 1, figure supplement 3.** Quantification of cellular ubiquitin levels by analysis of slot blots. Yeast strains (SEY6210 background) with endogenously FLAG-tagged ubiquitin (at the *RPL40B* and *RPS31* loci with native promoter and terminator containing an N-terminal 3xFLAG tag) were grown to mid-log phase and precipitated in 10% cold TCA. Total cell lysates from solubilized pellets were bound to PVDF membranes using a vacuum manifold and immunoblotting analysis was performed as indicated. Three biological replicate experiments are shown.
