# Supplementary material for: Ubiquitin turnover and endocytic trafficking in yeast are regulated by Ser57 phosphorylation of ubiquitin
Source: eLife journal article supplement (doi:10.7554/elife.29176), 2017-11-13
Supplement: supp [file elife-29176-supp-v1.zip › elife_poa_e29176_Figure_1_figure_supplement_4.pdf]

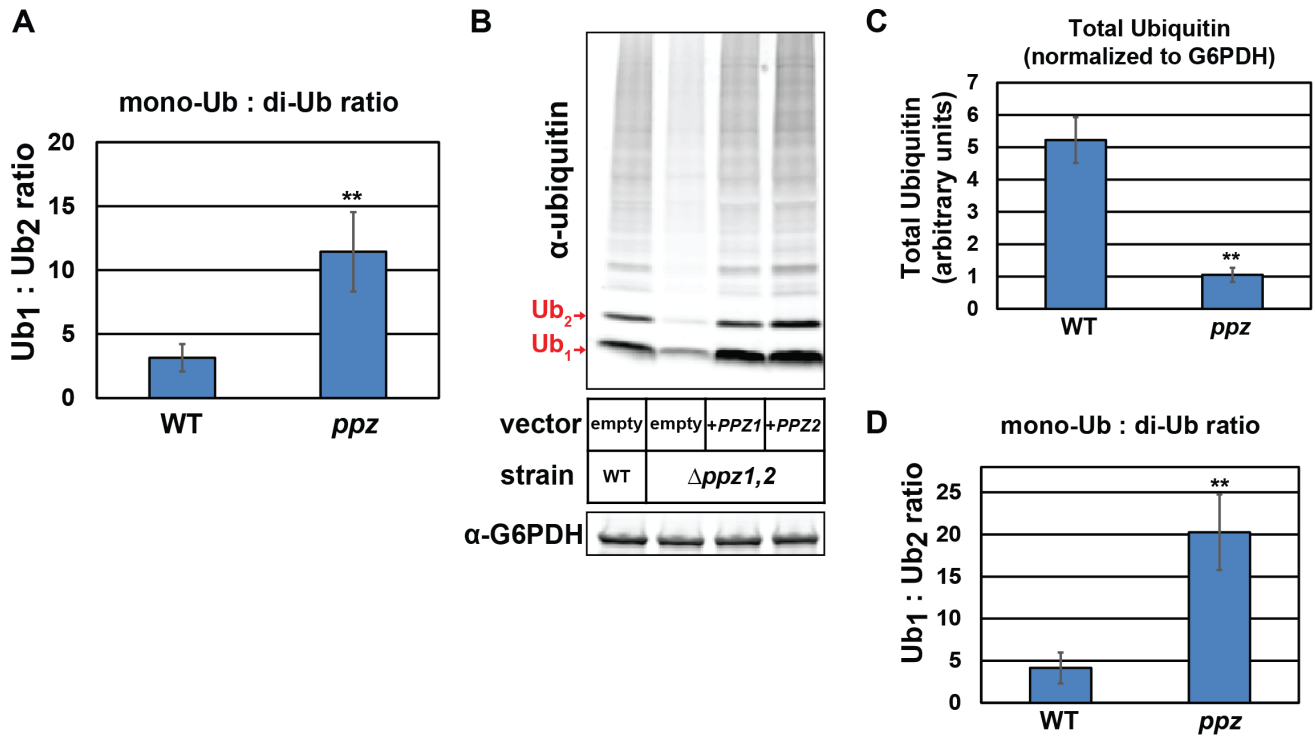

**Figure 1, figure supplement 4.** Characterization of ubiquitin levels and distribution in wildtype and  $\Delta ppz1\Delta ppz2$  cells. **(A)** Using quantitative immunoblots mono-ubiquitin : di-ubiquitin ratios were measured in yeast lysates (SEY6210 background) and averaged over multiple experiments ( $n = 5$ ). **(B)** The indicated yeast cells (SUB280 background) containing either empty vector or native *PPZ1* or *PPZ2* complementation vectors were analyzed for total cellular ubiquitin levels by immunoblot analysis. **(D)** Analysis of total ubiquitin in SUB280 yeast lysates from cells grown to mid-log phase in YPD. **(E)** Analysis of mono-ubiquitin : di-ubiquitin ratios were measured in yeast lysates (SUB280 background) and averaged over multiple experiments ( $n = 5$ ).
