# Supplementary material for: Ubiquitin turnover and endocytic trafficking in yeast are regulated by Ser57 phosphorylation of ubiquitin
Source: eLife journal article supplement (doi:10.7554/elife.29176), 2017-11-13
Supplement: supp [file elife-29176-supp-v1.zip › elife_poa_e29176_Figure_1_figure_supplement_5.pdf]

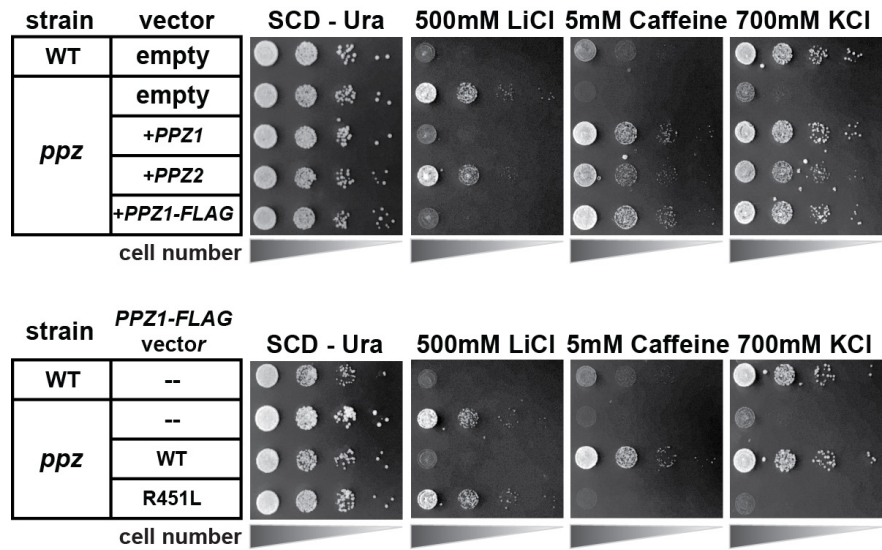

**Figure 1, figure supplement 5.** Catalytic activity of the Ppz1 phosphatase is required for phenotype complementation. In this experiment, yeast cells (SEY6210 background) containing either empty vector of the indicated complementation vector were plated in 10-fold serial dilutions on indicated plates.
