# Supplementary material for: Ubiquitin turnover and endocytic trafficking in yeast are regulated by Ser57 phosphorylation of ubiquitin
Source: eLife journal article supplement (doi:10.7554/elife.29176), 2017-11-13
Supplement: supp [file elife-29176-supp-v1.zip › elife_poa_e29176_Figure_1_source_data_2.xlsx]

## Sheet: Fig1C
							AVE	STD	TTEST
	WT+416(EV)	1	1	1	1	1	1	0
	ppz1,2+416(EV)	0.696887	0.702338	0.686588	0.686588	0.496003	0.653681	0.088406	0.000468145
	ppz1,2+1055(PPZ1-Flag)	1.17346	1.2561	1.04898	1.04898	0.805441	1.06659	0.170409	0.21577
	ppz1,2+1063(PPZ1-R451L-Flag)	0.745328	0.811401	0.610592	0.610592	0.547553	0.665093	0.109087	0.00117899

## Sheet: Fig1D
					AVE	STD	TTEST
	WT	1	1	1	1	0
	ppz1,2	0.778477	0.731605	0.731605	0.747229	0.0270614	0.00189939

## Sheet: Fig1F
	WT				AVE	STD	ttest
	CHX 0h	1	1	1	1	0
	CHX 1h	0.806312	0.748443	0.814356	0.789704	0.0359586
	CHX 3h	0.662446	0.40507	0.598753	0.555423	0.134048
	CHX 5h	0.369719	0.210751	0.305612	0.295361	0.079978
	ppz1,2
	CHX 0h	1	1	1	1	0
	CHX 1h	0.771939	0.687376	0.576845	0.67872	0.0978345
	CHX 3h	0.294434	0.250556	0.26429	0.26976	0.0224445	0.0249259
	CHX 5h	0.10079	0.0804497	0.120331	0.100524	0.019942	0.0201118
