# Supplementary material for: Ubiquitin turnover and endocytic trafficking in yeast are regulated by Ser57 phosphorylation of ubiquitin
Source: eLife journal article supplement (doi:10.7554/elife.29176), 2017-11-13
Supplement: supp [file elife-29176-supp-v1.zip › elife_poa_e29176_Figure_2_source_data1.xlsx]

## Sheet: Fig2B
					AVE	STD	TTEST
	WT-WT	1	1	1	1	0
	WT-S57A	1.07281	1.06349	1.01548	1.05059	0.0307644
	ppz1/2Δ-WT	0.396117	0.175838	0.309285	0.293746	0.110958	0.00406376
	ppz1/2Δ-S57A	0.660158	0.407511	0.632667	0.566779	0.138613	0.00476751

## Sheet: Fig2D,E
	WT				AVE	STD	TTEST
	UB-WT-CHX 0h	1	1	1	1	0
	CHX 1h	0.825068	0.826895	0.843171	0.831712	0.00996633
	CHX 3h	0.685639	0.601916	0.66387	0.650475	0.043439
	CHX 5h	0.512357	0.447204	0.50089	0.486817	0.0347817
	ppz1,2
	UB-WT-CHX 0h	1	1	1	1	0
	CHX 1h	0.671884	0.615424	0.715454	0.667587	0.0501535
	CHX 3h	0.574552	0.499869	0.518708	0.531043	0.0388399
	CHX 5h	0.379674	0.393513	0.402214	0.3918	0.0113672	0.0266838
	ppz1,2
	UB-S57A-CHX 0h	1	1	1	1	0
	CHX 1h	0.8496	0.865793	0.891119	0.868838	0.0209263
	CHX 3h	0.690295	0.745489	0.755158	0.730314	0.0349932
	CHX 5h	0.558077	0.666153	0.682677	0.635636	0.0676735	0.00880574
