# Supplementary material for: Ubiquitin turnover and endocytic trafficking in yeast are regulated by Ser57 phosphorylation of ubiquitin
Source: eLife journal article supplement (doi:10.7554/elife.29176), 2017-11-13
Supplement: supp [file elife-29176-supp-v1.zip › elife_poa_e29176_Figure_3_figure_supplement_1.pdf]

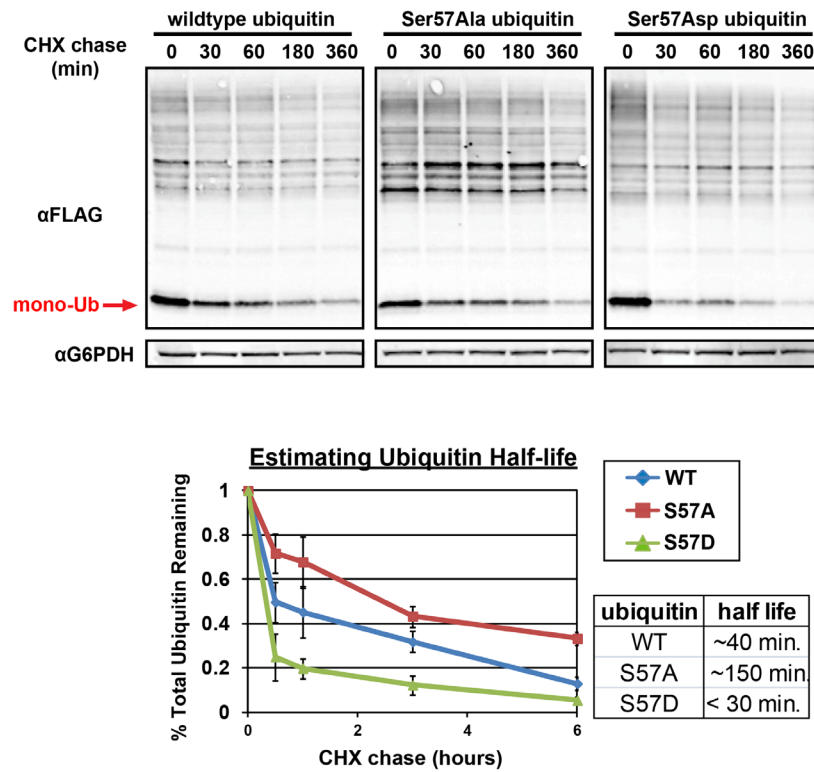

**Figure 3, figure supplement 1.** Analysis of ubiquitin half-life by SDS-PAGE immunoblot analysis of yeast lysates following a cycloheximide (CHX) chase (top panel). Yeast strains used in these experiments express FLAG-tagged ubiquitin from the endogenous *RPS31* locus. Quantitation of ubiquitin degradation (bottom panel) was averaged ( $n=3$ ) and error bars indicate standard deviation. Half-life was estimated in each case using trendline regression (table, inset bottom right).
