# Supplementary material for: Ubiquitin turnover and endocytic trafficking in yeast are regulated by Ser57 phosphorylation of ubiquitin
Source: eLife journal article supplement (doi:10.7554/elife.29176), 2017-11-13
Supplement: supp [file elife-29176-supp-v1.zip › elife_poa_e29176_Figure_4_figure_supplement_3.pdf]

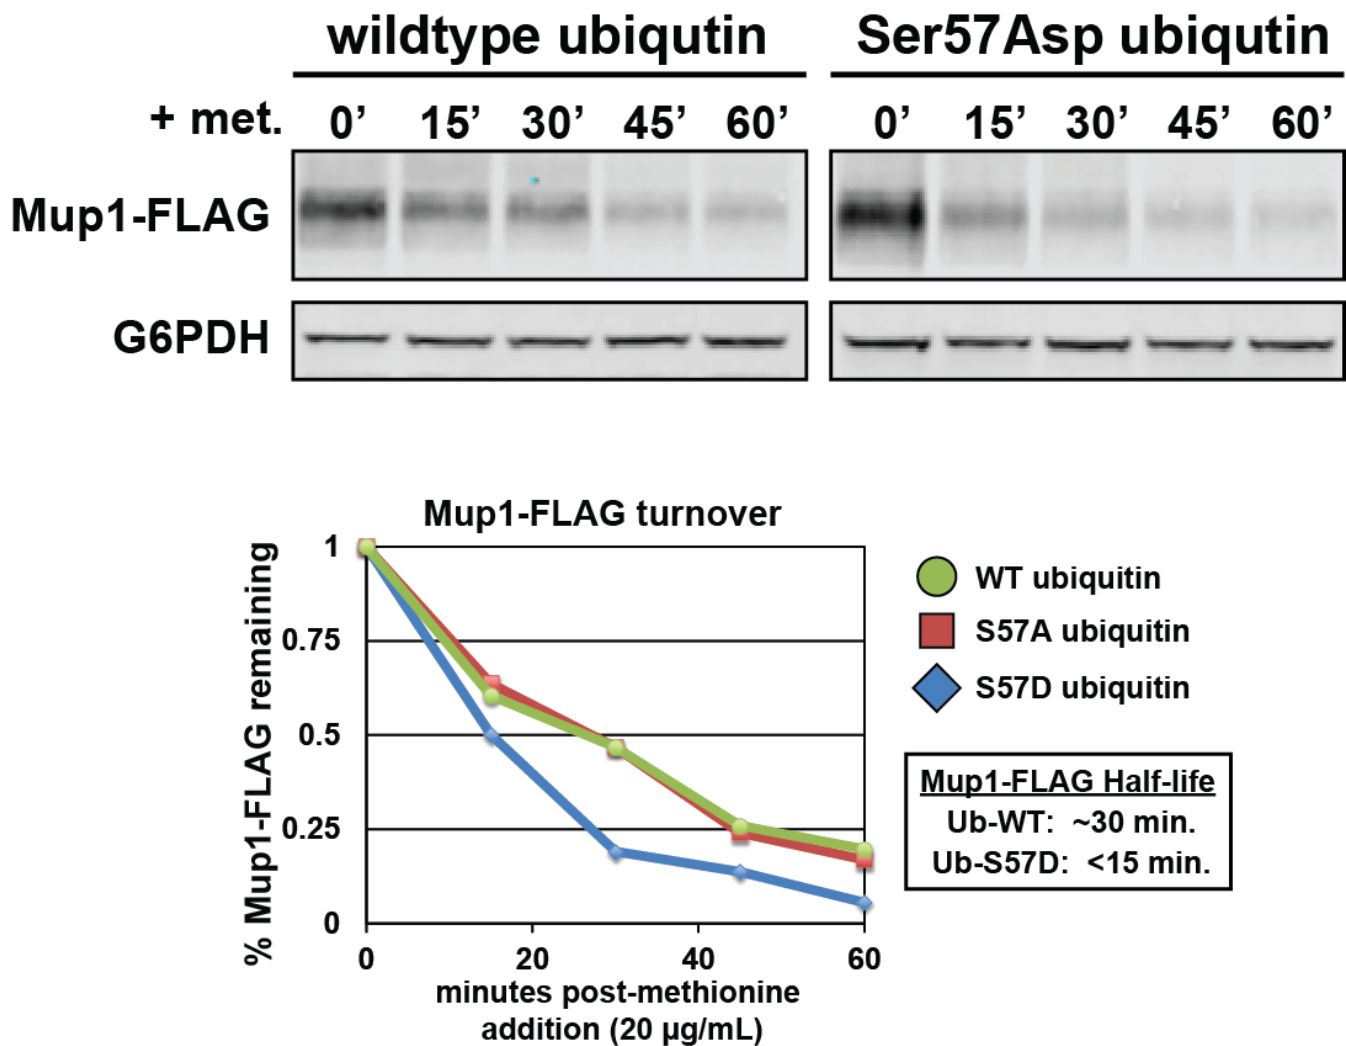

**Figure 4, figure supplement 3.** Expression of Ser57Asp phosphomimetic ubiquitin accelerates methionine-stimulated endocytic trafficking of Mup1. Top panel shows immunoblot analysis of FLAG-tagged Mup1 following stimulation of cells by addition of methionine. Bottom panel shows the quantitation of these Mup1 turnover experiments performed in the presence of wildtype (green circles), Ser57Ala (red squares), or Ser57Asp ubiquitin (blue diamonds).
