# Supplementary material for: Ubiquitin turnover and endocytic trafficking in yeast are regulated by Ser57 phosphorylation of ubiquitin
Source: eLife journal article supplement (doi:10.7554/elife.29176), 2017-11-13
Supplement: supp [file elife-29176-supp-v1.zip › elife_poa_e29176_Figure_5_figure_supplement_1.pdf]

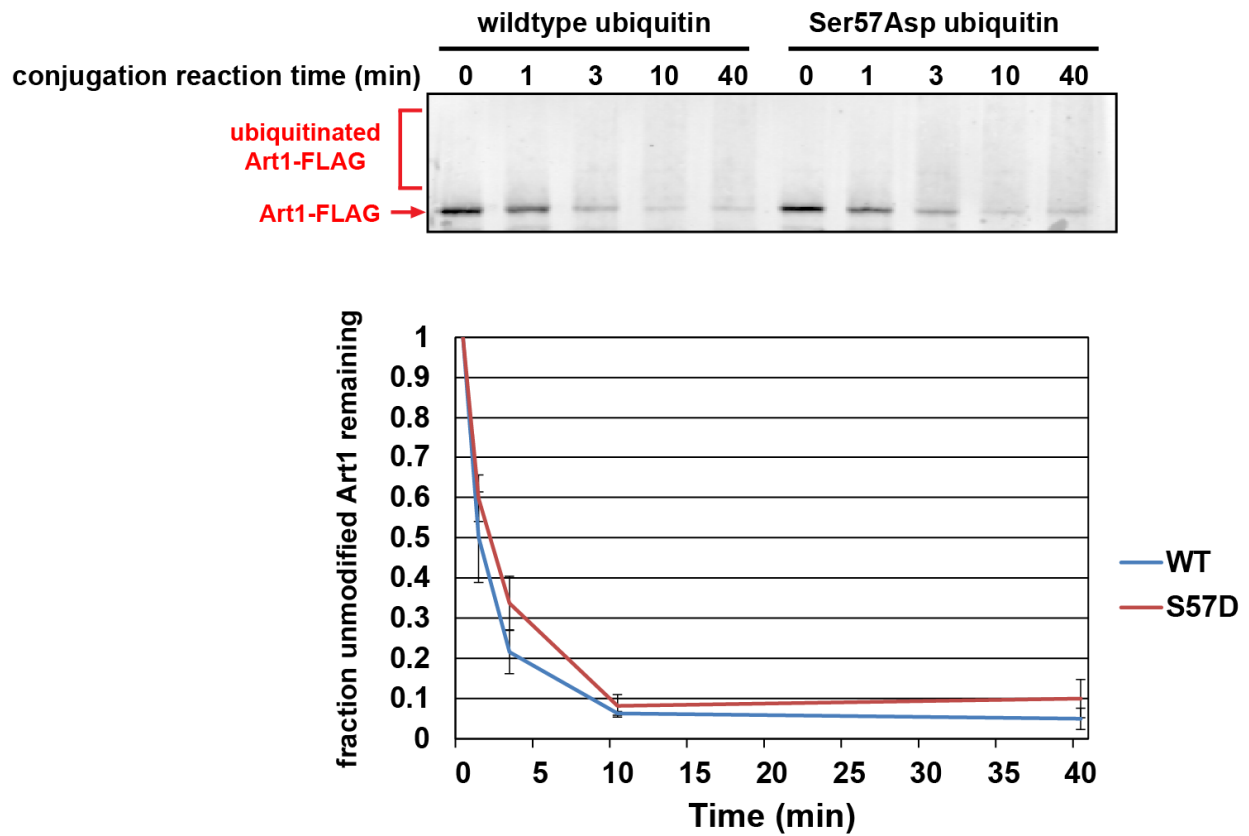

**Figure 5, figure supplement 1.** Ser57Asp phosphomimetic ubiquitin does not alter the rate of Rsp5-mediated conjugation *in vitro*. In this experiment, recombinant yeast proteins GST-Uba1 (E1), 6xHIS-Ubc1 (E2), 6xHIS-Rsp5 (E3), Art1-FLAG (substrate), and ubiquitin or Ser57Asp phosphomimetic ubiquitin were incubated at room temperature in the presence of ATP. Each conjugation time course was analyzed by  $\alpha$ -FLAG immunoblotting and quantified over three independent experiments (n=3).
