# Supplementary material for: Ubiquitin turnover and endocytic trafficking in yeast are regulated by Ser57 phosphorylation of ubiquitin
Source: eLife journal article supplement (doi:10.7554/elife.29176), 2017-11-13
Supplement: supp [file elife-29176-supp-v1.zip › elife_poa_e29176_Figure_5_figure_supplement_2.pdf]

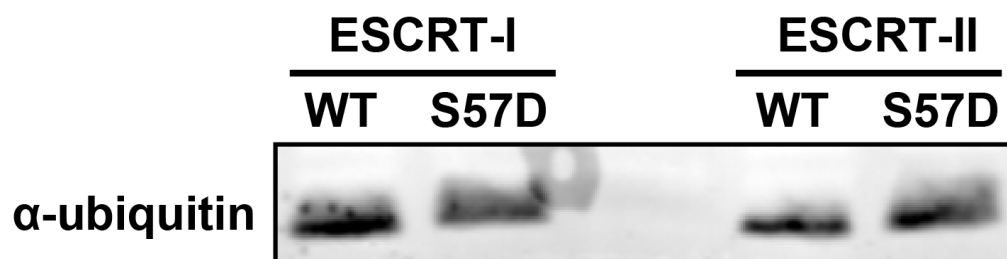

**Figure 5, figure supplement 2.** Ser57Asp phosphomimetic mutation does not alter binding of ubiquitin to ESCRT-I or ESCRT-II *in vitro*. In this experiment, recombinant ESCRT-I and ESCRT-II complexes were used as bait in the capture of wildtype or Ser57Asp phosphomimetic ubiquitin. Captured samples were analyzed by SDS-PAGE followed by immunoblotting for total ubiquitin.
