# Supplementary material for: Ubiquitin turnover and endocytic trafficking in yeast are regulated by Ser57 phosphorylation of ubiquitin
Source: eLife journal article supplement (doi:10.7554/elife.29176), 2017-11-13
Supplement: supp [file elife-29176-supp-v1.zip › elife_poa_e29176_Figure_5_figure_supplement_3.pdf]

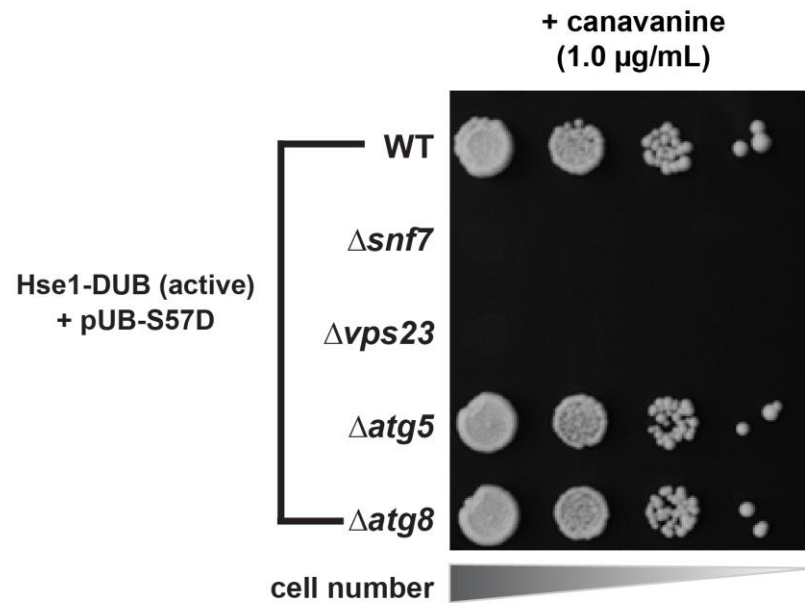

**Figure 5, figure supplement 3.** DUB bypass by Ser57Asp phosphomimetic ubiquitin requires an in-tact ESCRT pathway while the autophagy pathway is dispensible. Yeast strains (SEY6210 background) expressing Hse1-UL36 fusions and Ser57Asp phosphomimetic ubiquitin were analyzed for growth in the presence of canavanine in order to determine the genetic requirements for the canavanine resistance phenotype.
