# Supplementary material for: Ubiquitin turnover and endocytic trafficking in yeast are regulated by Ser57 phosphorylation of ubiquitin
Source: eLife journal article supplement (doi:10.7554/elife.29176), 2017-11-13
Supplement: supp [file elife-29176-supp-v1.zip › elife_poa_e29176_Figure_5_figure_supplement_4.pdf]

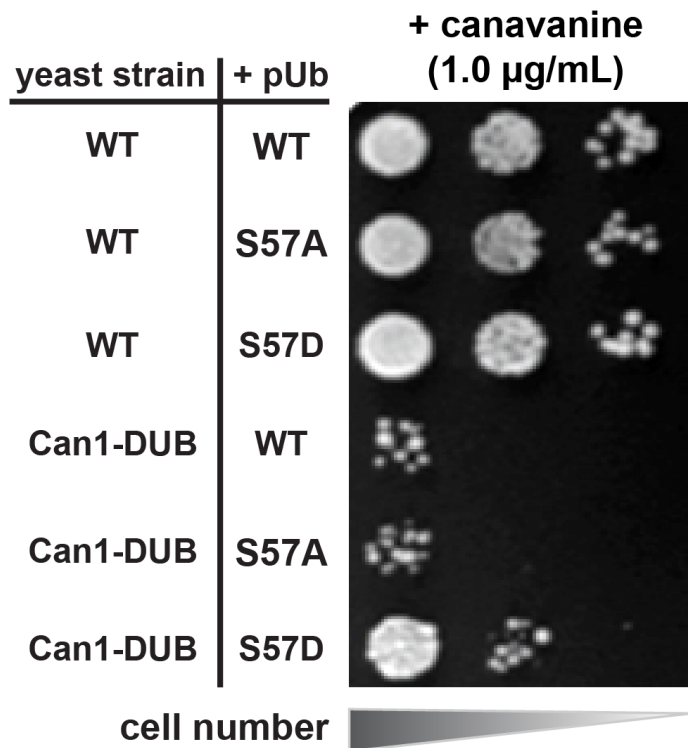

**Figure 5, figure supplement 4.** Bypass of a Can1-DUB fusion by Ser57Asp phosphomimetic ubiquitin. Wildtype yeast strains (SUB280 background) or an isogenic strain encoding an endogenous Can1-UL36 DUB fusion were analyzed for canavanine sensitivity/resistance in the presence of wildtype, Ser57Ala, or Ser57Asp phosphomimetic ubiquitin.
