# Supplementary material for: Ubiquitin turnover and endocytic trafficking in yeast are regulated by Ser57 phosphorylation of ubiquitin
Source: eLife journal article supplement (doi:10.7554/elife.29176), 2017-11-13
Supplement: supp [file elife-29176-supp-v1.zip › elife_poa_e29176_Figure_7_figure_supplement_1.pdf]

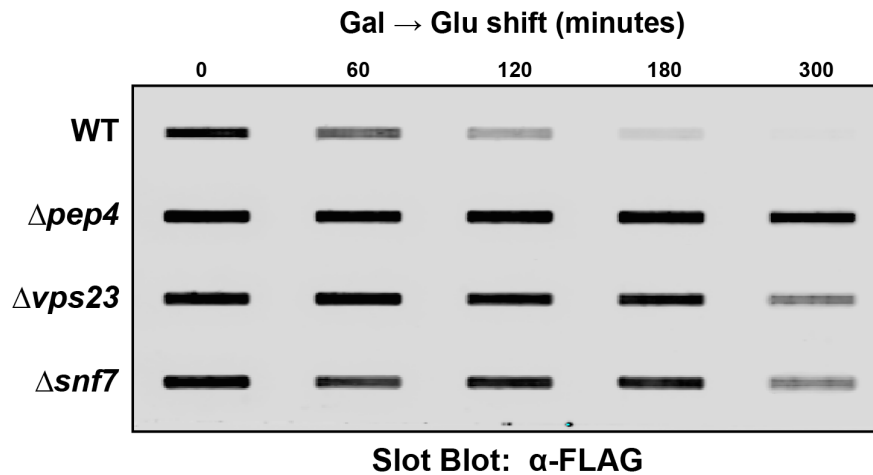

**Figure 7, figure supplement 1.** Slot blot analysis of FLAG-ubiquitin levels following a galactose induction/glucose repression. Results shown represent a single biological replicate. Results from triplicate experiments were quantified in ImageJ and used to generate the plots, as shown in Figure 7A, 7B and 7D.
