# Supplementary material for: Ubiquitin turnover and endocytic trafficking in yeast are regulated by Ser57 phosphorylation of ubiquitin
Source: eLife journal article supplement (doi:10.7554/elife.29176), 2017-11-13
Supplement: supp [file elife-29176-supp-v1.zip › elife_poa_e29176_Figure_7_figure_supplement_2.pdf]

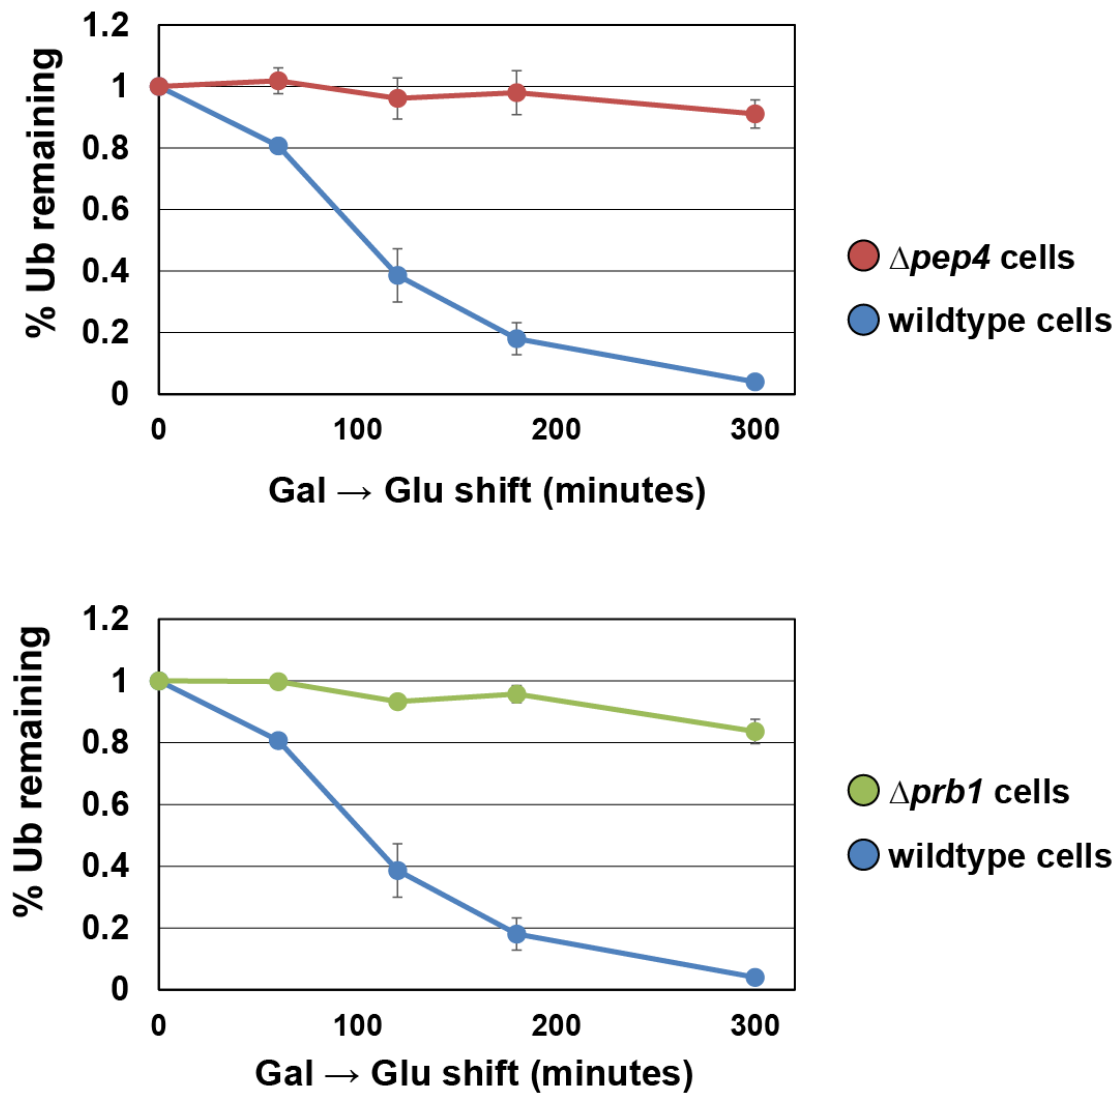

**Figure 7, figure supplement 2.** Quantitation of slot blot analysis of FLAG-ubiquitin levels following a galactose induction/glucose repression. Results plotted are the average values (n=3) for each time point with error bars indicating standard deviation.
